# Supplementary material for: Synergistic effect of N-decorated and Mn2+ doped ZnO nanofibers with enhanced photocatalytic activity
Source: PubMed Central journal article supplement (PMC5013319; doi:10.1038/srep32711), 2016-09-07
Supplement: srep32711-s1.pdf [file srep32711-s1.pdf]

Synergistic effect of N-decorated and Mn<sup>2+</sup> doped ZnO nanofibers with enhanced photocatalytic activity

Yuting Wang<sup>a</sup>, Jing Cheng<sup>a</sup>, Suye Yu<sup>c</sup>, Enric Juan Alcocer<sup>b</sup>, Muhammad Shahid <sup>a</sup>, Ziyuan Wang<sup>a</sup>, Wei Pan<sup>\*,a</sup>

<sup>a</sup>State Key Laboratory of New Ceramics and Fine Processing, School of Materials Science and Engineering, Tsinghua University, Beijing 100084, People's Republic of China

<sup>b</sup>Department of materials, Imperial College London, Exhibition Road, London SW7 2AZ, United Kingdom

<sup>c</sup>Department of Physics, University of Science and Technology Beijing, Beijing 100083, China

Corresponding Author

Correspondence and requests for materials should be addressed to W.P. (email: panw@mail.tsinghua.edu.cn)

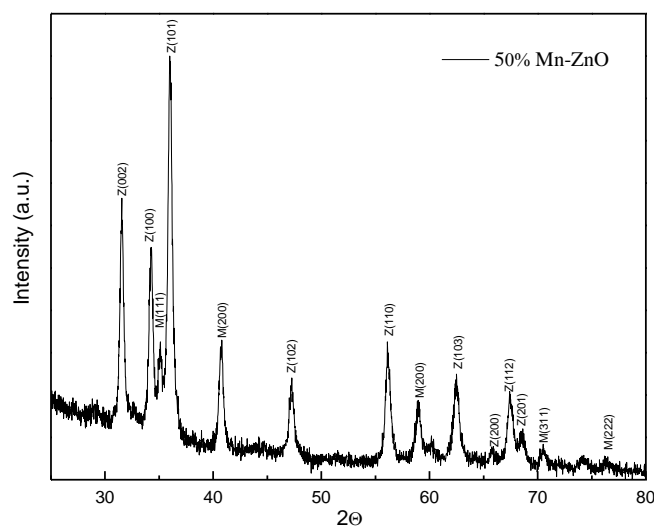

Figure S1. XRD patterns of 50% Mn<sup>2+</sup>-doped ZnO nanofibers.

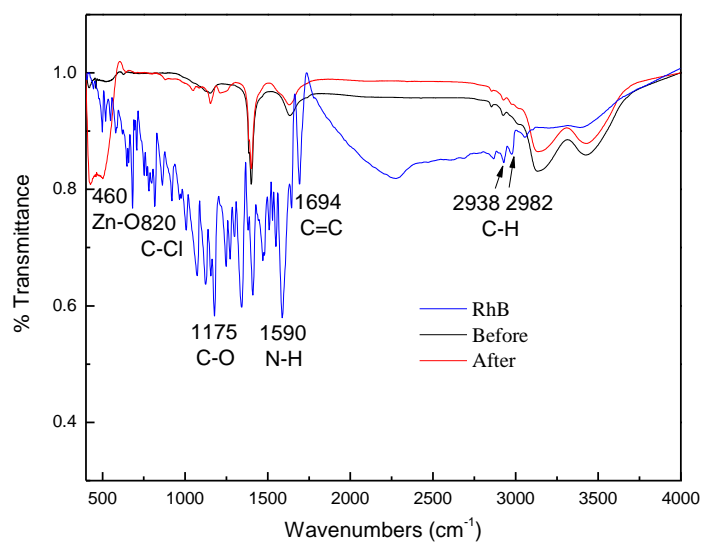

Figure S2. FTIR spectra of RhB, 15% Mn-ZnO NFs before and after photocatalytic cycles.

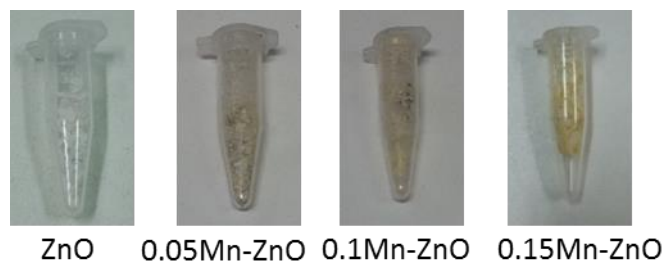

Figure S3. Digital photo images of ZnO, 0.05Mn-ZnO, 0.1Mn-ZnO, 0.15Mn-ZnO NFs powders.

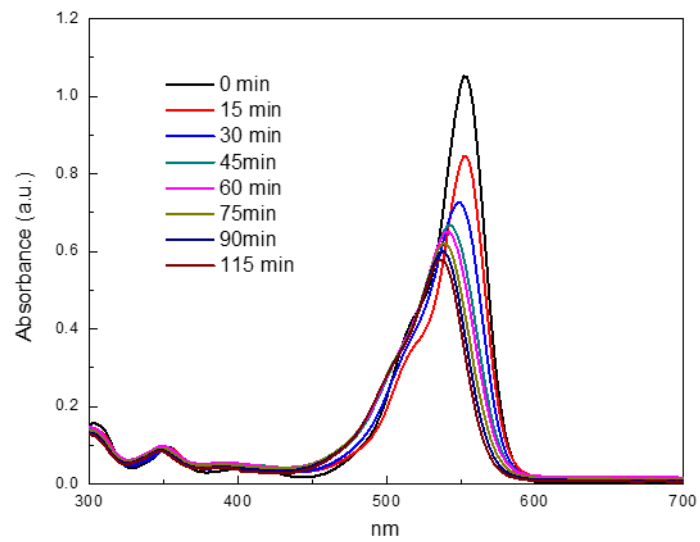

Figure S4. UV-vis absorption spectra of RhB at different time in the presence of 15% Mn<sup>2+</sup>-doped ZnO nanofibers annealed under vacuum.

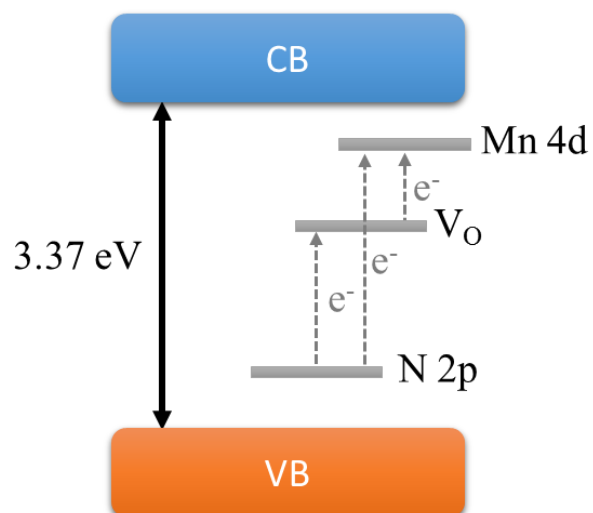

Figure S5. Proposed energy-band structure model for the Mn-doping and N-decorated ZnO photocatalyst.

Table S1 Lattice constants of ZnO and Mn<sup>2+</sup>-doped ZnO nanofibers using XRD.

|                                 | a     | c     |
|---------------------------------|-------|-------|
| ZnO                             | 3.242 | 5.194 |
| 5% Mn <sup>2+</sup> -doped ZnO  | 3.250 | 5.209 |
| 10% Mn <sup>2+</sup> -doped ZnO | 3.251 | 5.211 |
| 15% Mn <sup>2+</sup> -doped ZnO | 3.251 | 5.211 |

Table S2 Band gap values of ZnO and Mn<sup>2+</sup>-doped ZnO samples.

| Sample                          | Band gap (Experimental) | Band gap (Calculated) |
|---------------------------------|-------------------------|-----------------------|
| ZnO                             | 3.25 eV                 | 3.37 eV               |
| 5% Mn <sup>2+</sup> -doped ZnO  | 2.5 eV                  | 3.23 eV (4.2%)        |
| 10% Mn <sup>2+</sup> -doped ZnO | 2.4 eV                  | -                     |
| 15% Mn <sup>2+</sup> -doped ZnO | 2.3 eV                  | -                     |
